# Supplementary material for: Cyclometalated gold(iii) trioxadiborrin complexes: studies of the bonding and excited states
Source: Royal Society of Chemistry journal article supplement (doi:10.1039/c5dt04732c), 2016-01-01
Supplement: c5dt04732c2.pdf [file c5dt04732c2.pdf]

## SUPPORTING INFORMATION

### Cyclometalated Gold(III) Trioxadiborin Complexes: Studies of the Bonding and Excited States

Nicholas A. Ayoub, Bryce L. Anderson, and Thomas G. Gray\*

#### Contents

**Figure S1.** Calculated orbital energy levels.

**Table S1.** Calculated natural atomic charges.

**Table S2.** Fragment interaction energies, basis set superposition energies, bond snapping and bond dissociation energies for **1–8** and propanedionate analogue **1'**

**Table S3.** Contributions of unoccupied fragment Kohn-Sham orbitals (UFOs) to the occupied orbitals of **1–8** and charge transfer (a.u.) between fragments.

**Figure S2.** Selected Mayer bond orders calculated for propanedionate complex **1'**.

**Figure S3.** Simulated absorption spectra of **1–8** from TDDFT singlets computations.

Keywords used

Summary of calculated electronic transitions (PBE0/TZVP/SDD)

**Figure S1.** Kohn-Sham orbital energy levels of trioxadiborin complexes **1–8**. For selected orbitals, compositions in terms of fragment electron densities are indicated.

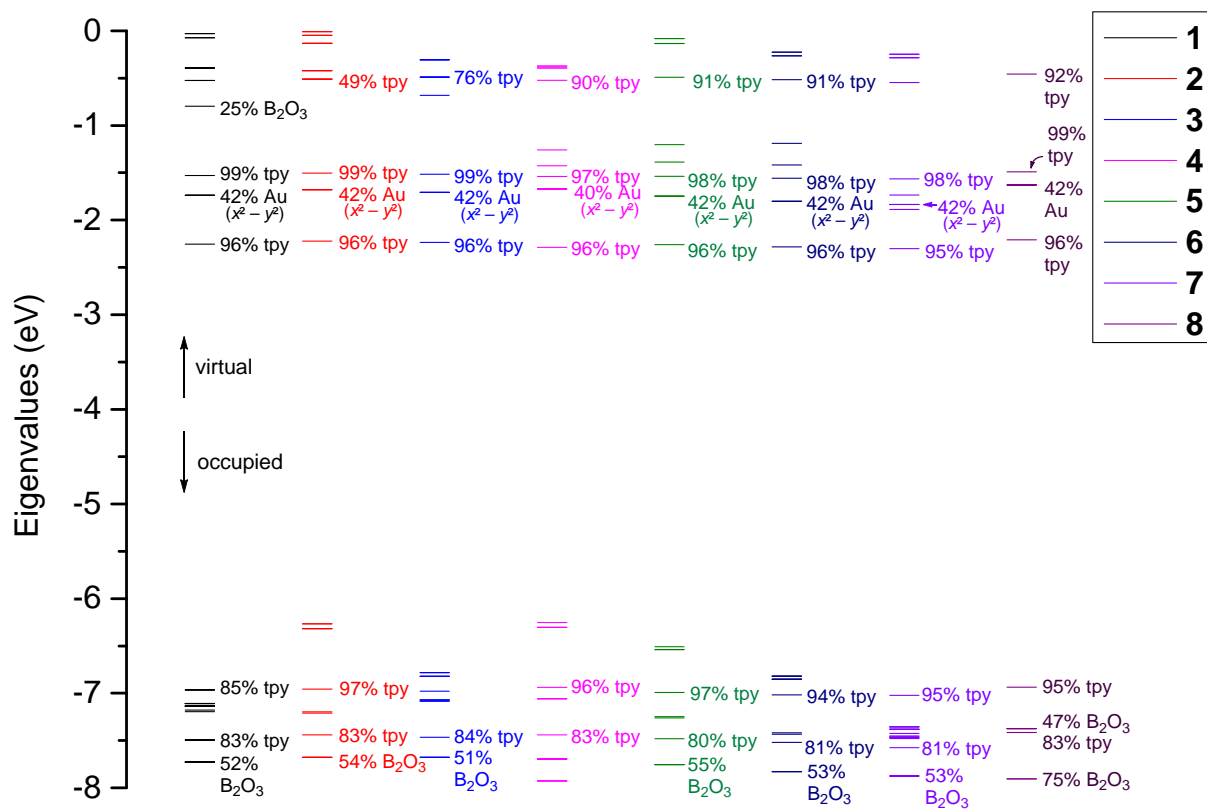

**Table S1.** Natural atomic charges of selected atoms in **1–8** (a.u.). Atom numbering is indicated below.

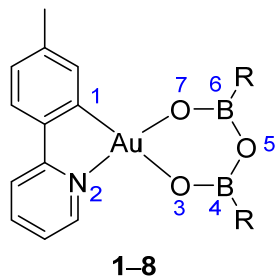

|    | <b>1</b> | <b>2</b> | <b>3</b> | <b>4</b> | <b>5</b> | <b>6</b> | <b>7</b> | <b>8</b> | Average |
|----|----------|----------|----------|----------|----------|----------|----------|----------|---------|
| Au | 1.037    | 1.035    | 1.036    | 1.045    | 1.038    | 1.040    | 1.040    | 1.025    | 1.037   |
| C1 | -0.120   | -0.122   | -0.121   | -0.121   | -0.120   | -0.118   | -0.116   | -0.126   | -0.121  |
| N2 | -0.411   | -0.411   | -0.411   | -0.416   | -0.411   | -0.410   | -0.410   | -0.412   | -0.412  |
| O3 | -0.956   | -0.959   | -0.957   | -0.972   | -0.956   | -0.955   | -0.953   | -0.963   | -0.959  |
| B4 | 1.075    | 1.073    | 1.074    | 1.098    | 1.073    | 1.074    | 1.074    | 1.095    | 1.080   |
| O5 | -0.889   | -0.891   | -0.889   | -0.905   | -0.889   | -0.888   | -0.887   | -0.899   | -0.892  |
| B6 | 1.078    | 1.078    | 1.080    | 1.101    | 1.076    | 1.077    | 1.077    | 1.100    | 1.083   |
| O7 | -0.876   | -0.877   | -0.876   | -0.893   | -0.876   | -0.876   | -0.875   | -0.880   | -0.879  |

**Table S2.** Fragment interaction energies, basis set superposition energies, bond snapping and bond dissociation energies for **1–8** and propanedionate analogue **1'** (kcal mol<sup>-1</sup>).

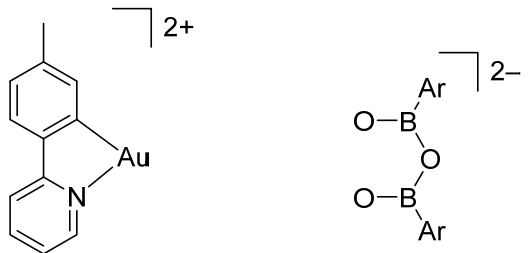

| Compound                    | <b>1</b> | <b>2</b> | <b>3</b> | <b>4</b> | <b>5</b> | <b>6</b> | <b>7</b> | <b>8</b> | <b>1'</b> |
|-----------------------------|----------|----------|----------|----------|----------|----------|----------|----------|-----------|
| Fragment interaction energy | -194.7   | -198.0   | -196.5   | -195.3   | -193.7   | -190.7   | -189.1   | -203.0   | -127.56   |
| Bond snapping enthalpy      | 190.7    | 200.7    | 198.2    | 192.4    | 194.7    | 192.6    | 184.5    | 204.6    | 121.9     |
| Bond dissociation enthalpy  | 179.9    | 181.5    | 181.5    | 174.4    | 176.9    | 175.6    | 174.0    | 187.3    | 82.6      |
| BSSE <sup>a</sup>           | 4.2      | 4.0      | 3.9      | 3.8      | 3.7      | 3.6      | 3.5      | 5.0      | 4.3       |

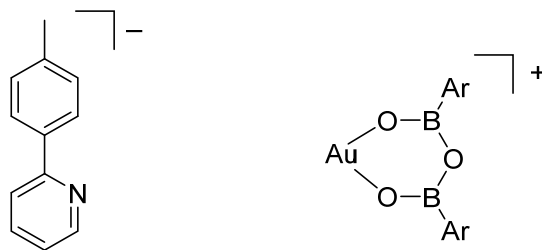

| Compound                    | <b>1</b> | <b>2</b> | <b>3</b> | <b>4</b> | <b>5</b> | <b>6</b> | <b>7</b> | <b>8</b> |
|-----------------------------|----------|----------|----------|----------|----------|----------|----------|----------|
| Fragment interaction energy | -215.25  | -210.6   | -213.6   | -209.3   | -214.3   | -217.8   | -219.5   | -207.23  |
| Bond snapping enthalpy      | 207.5    | 207.6    | 206.6    | 205.6    | 209.0    | 210.3    | 211.8    | 203.9    |
| Bond dissociation enthalpy  | 193.8    | 187.9    | 191.9    | 184.3    | 191.5    | 195.5    | 198.0    | 184.7    |
| BSSE                        | 4.4      | 4.2      | 4.4      | 4.2      | 4.2      | 4.3      | 4.5      | 4.4      |

<sup>a</sup> Gas-phase.

**Table S3.** Contributions of unoccupied fragment Kohn-Sham orbitals (UFOs) to the occupied orbitals of **1–8** and charge transfer (a.u.) between fragments.

|                                                                                                                      | <b>1</b> | <b>2</b> | <b>3</b> | <b>4</b> | <b>5</b> | <b>6</b> | <b>7</b> | <b>8</b> | <b>1'</b> |
|----------------------------------------------------------------------------------------------------------------------|----------|----------|----------|----------|----------|----------|----------|----------|-----------|
| donation (trioxadiborrin <sup>2-</sup> → (tpy)Au <sup>2+</sup> ) + polarization of (tpy)Au <sup>2+</sup>             |          |          |          |          |          |          |          |          |           |
| Contribution UFOs of (tpy)Au <sup>2+</sup> to all occupied MOs (× 100)                                               | 54.7     | 55.3     | 54.8     | 56.0     | 54.3     | 53.7     | 53.3     | 56.8     | 44.3      |
| back donation ((tpy)Au <sup>2+</sup> → trioxadiborrin <sup>2-</sup> ) + polarization of trioxadiborrin <sup>2-</sup> |          |          |          |          |          |          |          |          |           |
| Contribution of UFOs of trioxadiborrin <sup>2-</sup> to all unoccupied MOs (× 100)                                   | 5.7      | 5.9      | 5.8      | 7.0      | 6.1      | 6.0      | 6.0      | 4.8      | 5.3       |
| ECDA Net charge transfer                                                                                             |          |          |          |          |          |          |          |          |           |
| Trioxadiborrin <sup>2-</sup> → (tpy)Au <sup>2+</sup> <sup>a</sup>                                                    | 1.01     | 1.02     | 1.01     | 1.02     | 1.01     | 1.00     | 0.99     | 1.06     | 0.82      |
| NPA charge transfer ( $\Delta q^{\text{NPA}}$ )                                                                      |          |          |          |          |          |          |          |          |           |
| Trioxadiborrin <sup>2-</sup> → (tpy)Au <sup>2+</sup>                                                                 | 0.82     | 0.83     | 0.82     | 0.82     | 0.81     | 0.80     | 0.80     | 0.85     | 0.66      |
| donation (tpy <sup>-</sup> → Au(trioxadiborrin) <sup>+</sup> ) + Polarization of (trioxadiborrin)Au <sup>+</sup>     |          |          |          |          |          |          |          |          |           |
| Contribution of UFOs of Au(trioxadiborrin) <sup>+</sup> to all occupied MOs (× 100)                                  | 85.1     | 91.2     | 84.9     | 92.9     | 90.2     | 87.4     | 85.9     | 84.0     | 104.2     |
| back donation (Au(trioxadiborrin) <sup>+</sup> → tpy <sup>-</sup> ) + Polarization of tpy <sup>-</sup>               |          |          |          |          |          |          |          |          |           |
| Contribution of UFOs of tpy <sup>-</sup> to all unoccupied MOs (× 100)                                               | 11.1     | 11.1     | 11.1     | 11.7     | 11.1     | 11.2     | 11.2     | 11.1     | 11.8      |
| ECDA Net charge transfer                                                                                             |          |          |          |          |          |          |          |          |           |
| tpy → (trioxadiborrin)Au <sup>2+</sup> <sup>a</sup>                                                                  | 1.62     | 1.67     | 1.65     | 1.62     | 1.62     | 1.68     | 1.65     | 1.68     | 1.78      |
| NPA charge transfer ( $\Delta q^{\text{NPA}}$ )                                                                      |          |          |          |          |          |          |          |          |           |
| tpy → (trioxadiborrin)Au <sup>2+</sup> <sup>a</sup>                                                                  | 0.85     | 0.86     | 0.86     | 0.86     | 0.85     | 0.84     | 0.84     | 0.87     | 0.71      |

<sup>a</sup> Net number of electrons transferred

**Table S4.** Components of Mayer bond orders in  $C_s$ -symmetric **1**. Atom numbering is indicated below.

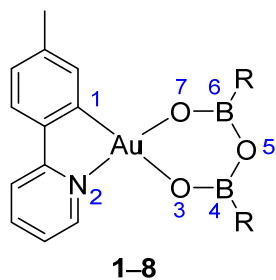

| Atom | Atom or Fragment                              | A'   | A''  |
|------|-----------------------------------------------|------|------|
| Au   | B <sub>2</sub> O <sub>3</sub> Ph <sub>2</sub> | 1.02 | 0.14 |
| Au   | tpy                                           | 1.40 | 0.10 |
| Au   | C(1)                                          | 0.82 | 0.04 |
| Au   | N(2)                                          | 0.48 | 0.02 |
| Au   | O(3)                                          | 0.34 | 0.06 |
| Au   | O(7)                                          | 0.52 | 0.06 |

**Figure S2.** Selected Mayer bond orders calculated for propanedionate complex **1'**.

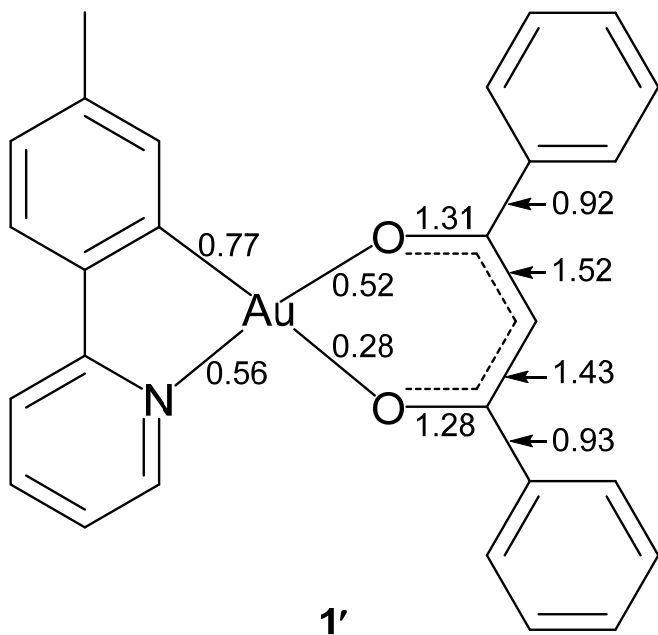

**Figure S3.** Simulated absorption spectra of **1–8** from TDDFT singlets computations.

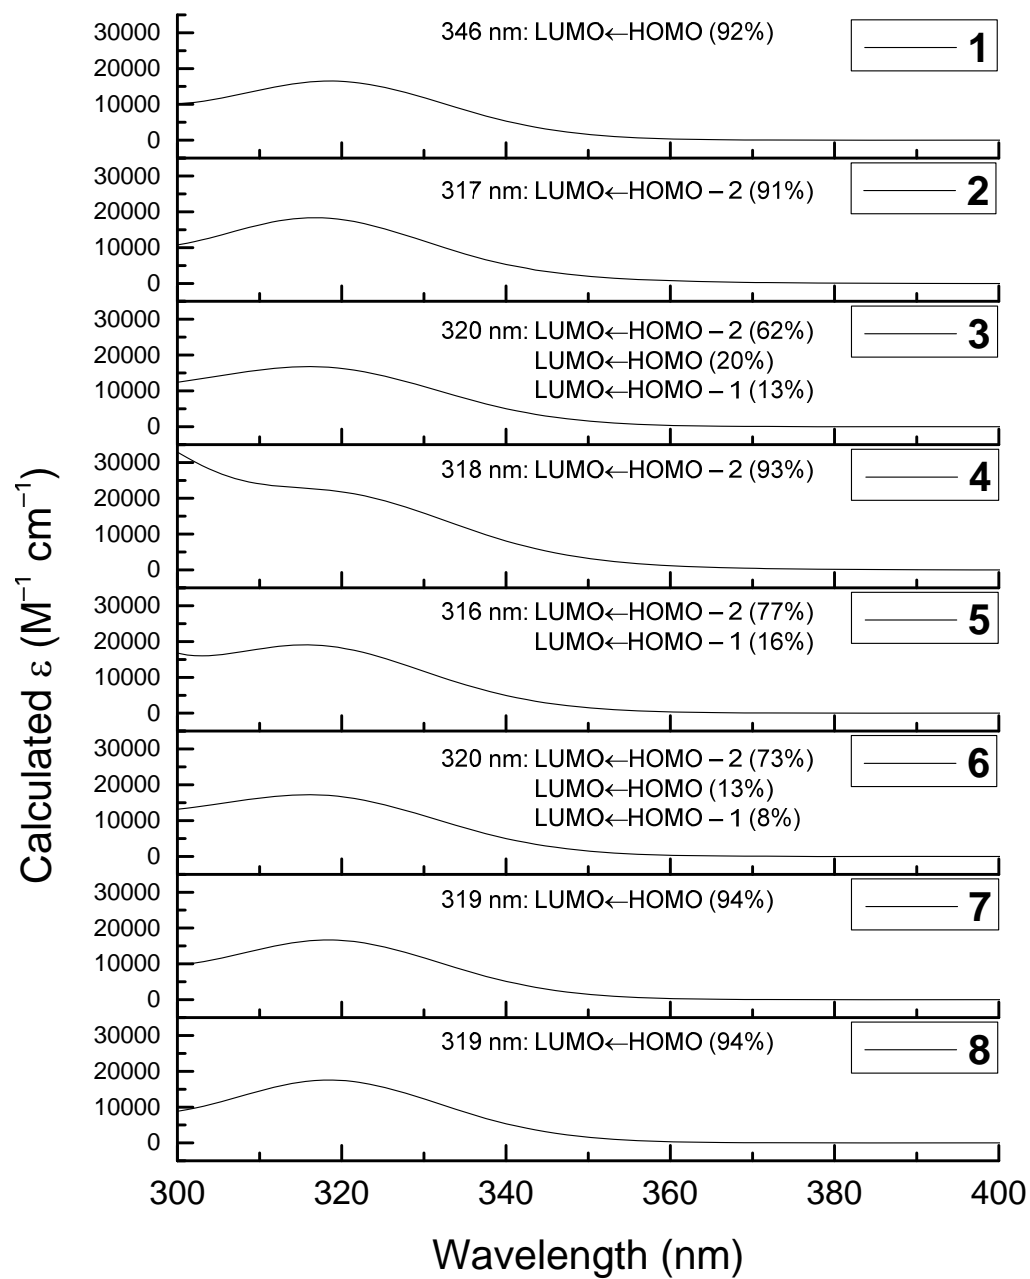



## **Gaussian09 keyword lines**

### Geometry optimizations:

```
# pbelpbe/gen nosymm pseudo=read scf=(tight,maxcycle=150) pop=minimal  
opt freq=noraman scrf(iefpcm,solvent=tetrahydrofuran)
```

### Population analyses:

```
#p pbelpbe/gen nosymm pseudo=read scf=(tight,maxcycle=150)  
pop=(full,npa) scrf(iefpcm,solvent=tetrahydrofuran) iop(3/33=1)
```

### Time-dependent DFT:

```
# td(singlets,nstates=40) pbelpbe/gen pseudo=read  
scf=(tight,maxcycle=150) pop=minimal symm=veryloose  
scrf(iefpcm,solvent=tetrahydrofuran)
```

```
# td(triplets,nstates=20) pbelpbe/gen pseudo=read  
scf=(tight,maxcycle=150) pop=minimal symm=veryloose  
scrf(iefpcm,solvent=tetrahydrofuran)
```

### CIS:

```
# CIS(singlets,nstates=40)/gen pseudo=read  
scf=(tight,maxcycle=150) pop=minimal symm=veryloose  
scrf(iefpcm,solvent=tetrahydrofuran)
```

```
# CIS(triplets,nstates=40)/gen pseudo=read  
scf=(tight,maxcycle=150) pop=minimal symm=veryloose  
scrf(iefpcm,solvent=tetrahydrofuran)
```

### CIS(D):

```
#t CIS(D,singlets,nstates=3)/gen pseudo=read scf=(tight,maxcycle=150)  
pop=minimal symm=veryloose  
GUESS=CARDS
```

```
#t CIS(D,triplets,nstates=3)/gen pseudo=read scf=(tight,maxcycle=150)  
pop=minimal symm=veryloose  
GUESS=CARDS
```

## Summary of calculated electronic transitions (PBE0/TZVP/SDD)

### Phenyl 1

Summary of calculated electronic transitions:

| #  | nm    | 1000 cm <sup>-1</sup> | eV    | f      | Assignment (excitations with contrib. greater than 10.0%)       |
|----|-------|-----------------------|-------|--------|-----------------------------------------------------------------|
| 1  | 319.5 | 31.30                 | 3.881 | 0.2220 | 112->113(92.0%)                                                 |
| 2  | 305.6 | 32.72                 | 4.057 | 0.0006 | 112->114(88.9%)                                                 |
| 3  | 290.8 | 34.38                 | 4.263 | 0.0917 | 111->113(46.2%) 107->113(34.6%)                                 |
| 4  | 282.8 | 35.36                 | 4.384 | 0.0323 | 110->113(82.0%) 107->113(11.1%)                                 |
| 5  | 281.0 | 35.59                 | 4.413 | 0.0087 | 111->113(49.3%) 107->113(33.6%)                                 |
| 6  | 280.6 | 35.64                 | 4.419 | 0.0001 | 107->114(51.6%) 111->114(31.0%)                                 |
| 7  | 278.1 | 35.96                 | 4.459 | 0.0001 | 109->113(88.7%)                                                 |
| 8  | 275.4 | 36.31                 | 4.502 | 0.0001 | 110->114(78.2%)                                                 |
| 9  | 275.3 | 36.32                 | 4.503 | 0.0012 | 108->113(88.5%)                                                 |
| 10 | 270.4 | 36.98                 | 4.585 | 0.0004 | 106->113(95.9%)                                                 |
| 11 | 264.9 | 37.75                 | 4.680 | 0.1936 | 112->115(76.8%) 107->113(11.1%)                                 |
| 12 | 261.9 | 38.18                 | 4.734 | 0.0014 | 111->114(61.9%) 107->114(31.2%)                                 |
| 13 | 257.6 | 38.82                 | 4.813 | 0.0001 | 108->114(68.0%) 109->114(27.2%)                                 |
| 14 | 256.8 | 38.95                 | 4.829 | 0.0123 | 105->114(90.0%)                                                 |
| 15 | 255.7 | 39.11                 | 4.849 | 0.0001 | 109->114(61.0%) 108->114(28.6%)                                 |
| 16 | 247.2 | 40.46                 | 5.016 | 0.0445 | 111->115(60.6%) 107->115(18.1%) 110->115(11.3%)                 |
| 17 | 246.0 | 40.65                 | 5.040 | 0.7166 | 106->114(76.6%)                                                 |
| 18 | 244.7 | 40.86                 | 5.066 | 0.0007 | 105->113(91.7%)                                                 |
| 19 | 243.0 | 41.16                 | 5.103 | 0.0015 | 104->114(75.0%)                                                 |
| 20 | 241.0 | 41.49                 | 5.144 | 0.0130 | 110->115(74.0%) 107->115(17.6%)                                 |
| 21 | 239.9 | 41.69                 | 5.169 | 0.0123 | 109->115(62.3%) 111->115(11.6%)                                 |
| 22 | 238.8 | 41.88                 | 5.193 | 0.0282 | 107->115(37.4%) 111->115(19.5%) 109->115(18.7%)                 |
| 23 | 236.3 | 42.31                 | 5.246 | 0.0090 | 108->115(37.8%) 108->116(21.2%)                                 |
| 24 | 235.4 | 42.48                 | 5.267 | 0.0003 | 109->116(36.6%) 111->120(12.6%) 109->115(10.3%)                 |
| 25 | 235.1 | 42.54                 | 5.274 | 0.0021 | 108->115(43.3%) 108->116(21.3%)                                 |
| 26 | 234.6 | 42.62                 | 5.284 | 0.3588 | 104->113(79.6%)                                                 |
| 27 | 230.5 | 43.38                 | 5.379 | 0.0013 | 106->115(96.7%)                                                 |
| 28 | 223.7 | 44.71                 | 5.543 | 0.1702 | 112->117(22.7%) 112->116(22.0%) 102->113(20.4%)                 |
| 29 | 222.6 | 44.92                 | 5.569 | 0.3344 | 111->116(45.7%)                                                 |
| 30 | 221.0 | 45.24                 | 5.609 | 0.0007 | 102->114(81.0%)                                                 |
| 31 | 219.4 | 45.59                 | 5.652 | 0.1026 | 112->116(44.9%) 110->116(21.6%) 102->113(11.6%)                 |
| 32 | 217.9 | 45.90                 | 5.691 | 0.0316 | 111->116(18.2%) 100->114(14.4%) 96->114(14.2%) 103->114(10.1%)  |
| 33 | 217.5 | 45.98                 | 5.701 | 0.0023 | 103->113(75.5%)                                                 |
| 34 | 216.9 | 46.09                 | 5.715 | 0.0221 | 101->113(46.3%) 110->116(12.2%)                                 |
| 35 | 215.8 | 46.34                 | 5.746 | 0.0174 | 110->116(36.1%) 112->116(15.0%) 101->113(11.8%)                 |
| 36 | 214.9 | 46.53                 | 5.769 | 0.0480 | 102->113(57.6%) 112->117(18.4%)                                 |
| 37 | 211.8 | 47.22                 | 5.854 | 0.0021 | 106->116(81.2%)                                                 |
| 38 | 211.1 | 47.37                 | 5.873 | 0.0004 | 105->115(89.8%)                                                 |
| 39 | 209.8 | 47.68                 | 5.911 | 0.0052 | 100->113(56.0%) 96->113(21.3%) 103->113(15.1%)                  |
| 40 | 207.5 | 48.19                 | 5.975 | 0.0442 | 112->118(27.8%) 110->117(19.3%) 111->117(15.0%) 112->117(10.7%) |

Isopropoxy 2

Summary of calculated electronic transitions:

| #  | nm    | 1000 cm <sup>-1</sup> | eV    | f      | Assignment (excitations with contrib. greater than 10.0%)       |
|----|-------|-----------------------|-------|--------|-----------------------------------------------------------------|
| 1  | 346.1 | 28.89                 | 3.582 | 0.0078 | 144->145(84.0%) 143->145(14.5%)                                 |
| 2  | 340.3 | 29.38                 | 3.643 | 0.0042 | 143->145(83.5%) 144->145(15.3%)                                 |
| 3  | 317.7 | 31.47                 | 3.902 | 0.0034 | 143->146(85.8%)                                                 |
| 4  | 317.2 | 31.53                 | 3.909 | 0.2432 | 142->145(90.7%)                                                 |
| 5  | 315.1 | 31.74                 | 3.935 | 0.0002 | 144->146(89.9%)                                                 |
| 6  | 298.5 | 33.50                 | 4.153 | 0.0002 | 142->146(80.4%)                                                 |
| 7  | 289.0 | 34.60                 | 4.290 | 0.0367 | 144->147(55.5%) 139->145(22.1%) 143->147(14.7%)                 |
| 8  | 287.1 | 34.83                 | 4.318 | 0.0631 | 139->145(55.9%) 144->147(27.9%)                                 |
| 9  | 282.2 | 35.43                 | 4.393 | 0.0109 | 143->147(82.2%) 144->147(16.0%)                                 |
| 10 | 276.9 | 36.12                 | 4.478 | 0.0000 | 139->146(74.8%)                                                 |
| 11 | 275.0 | 36.36                 | 4.508 | 0.0015 | 141->145(91.7%)                                                 |
| 12 | 272.6 | 36.68                 | 4.548 | 0.0000 | 140->145(95.3%)                                                 |
| 13 | 271.7 | 36.80                 | 4.563 | 0.0002 | 138->145(91.6%)                                                 |
| 14 | 264.8 | 37.76                 | 4.682 | 0.1774 | 142->147(79.7%)                                                 |
| 15 | 258.3 | 38.71                 | 4.800 | 0.0145 | 137->146(89.7%)                                                 |
| 16 | 255.5 | 39.14                 | 4.853 | 0.0007 | 140->146(71.1%) 136->146(15.7%)                                 |
| 17 | 251.8 | 39.71                 | 4.924 | 0.0056 | 141->146(84.1%)                                                 |
| 18 | 248.2 | 40.29                 | 4.995 | 1.0454 | 138->146(65.7%)                                                 |
| 19 | 247.5 | 40.40                 | 5.009 | 0.0109 | 137->145(82.8%)                                                 |
| 20 | 246.3 | 40.59                 | 5.033 | 0.0020 | 136->146(55.8%) 140->146(14.4%) 137->145(13.3%)                 |
| 21 | 245.8 | 40.69                 | 5.045 | 0.1553 | 144->151(26.9%) 143->150(13.3%) 143->152(11.4%) 144->148(10.8%) |
| 22 | 245.3 | 40.77                 | 5.055 | 0.0657 | 143->151(30.4%) 144->150(23.0%) 144->152(11.9%)                 |
| 23 | 243.4 | 41.08                 | 5.093 | 0.0659 | 139->147(72.8%) 141->147(10.5%)                                 |
| 24 | 242.2 | 41.30                 | 5.120 | 0.4426 | 144->148(44.1%) 144->149(24.1%)                                 |
| 25 | 239.0 | 41.84                 | 5.187 | 0.3963 | 136->145(56.5%) 143->148(16.7%) 143->149(10.4%)                 |
| 26 | 237.3 | 42.13                 | 5.224 | 0.0235 | 141->147(80.9%)                                                 |
| 27 | 233.9 | 42.75                 | 5.300 | 0.0032 | 140->147(94.9%)                                                 |
| 28 | 233.6 | 42.81                 | 5.308 | 0.0130 | 143->148(60.2%) 136->145(13.7%)                                 |
| 29 | 232.1 | 43.09                 | 5.343 | 0.0015 | 138->147(86.7%)                                                 |
| 30 | 232.0 | 43.11                 | 5.345 | 0.0093 | 144->149(31.3%) 144->148(26.5%) 143->149(14.4%) 138->147(10.0%) |
| 31 | 229.2 | 43.63                 | 5.410 | 0.0272 | 143->149(52.4%) 144->149(24.9%)                                 |
| 32 | 227.8 | 43.89                 | 5.442 | 0.0004 | 135->146(74.1%)                                                 |
| 33 | 226.8 | 44.09                 | 5.467 | 0.0367 | 135->145(64.7%)                                                 |
| 34 | 221.2 | 45.20                 | 5.604 | 0.0519 | 144->150(28.6%) 143->150(18.7%) 144->152(15.6%) 143->152(11.5%) |
| 35 | 220.5 | 45.36                 | 5.624 | 0.0743 | 144->150(27.7%) 143->150(24.8%) 144->152(10.7%)                 |
| 36 | 218.8 | 45.71                 | 5.667 | 0.0837 | 142->148(33.2%) 135->145(16.8%) 142->149(13.3%) 133->145(12.5%) |
| 37 | 217.5 | 45.98                 | 5.701 | 0.0069 | 128->146(23.0%) 143->150(16.2%)                                 |
| 38 | 216.9 | 46.10                 | 5.716 | 0.0003 | 133->145(47.4%) 136->147(14.4%)                                 |
| 39 | 216.6 | 46.16                 | 5.723 | 0.0006 | 134->145(69.4%) 128->145(12.9%)                                 |
| 40 | 216.1 | 46.27                 | 5.737 | 0.0022 | 144->153(68.8%)                                                 |

**t-butyl 3**

Summary of calculated electronic transitions:

| #  | nm    | 1000 cm <sup>-1</sup> | eV    | f      | Assignment (excitations with contrib. greater than 10.0%)       |
|----|-------|-----------------------|-------|--------|-----------------------------------------------------------------|
| 1  | 319.5 | 31.30                 | 3.881 | 0.2220 | 112->113(92.0%)                                                 |
| 2  | 305.6 | 32.72                 | 4.057 | 0.0006 | 112->114(88.9%)                                                 |
| 3  | 290.8 | 34.38                 | 4.263 | 0.0917 | 111->113(46.2%) 107->113(34.6%)                                 |
| 4  | 282.8 | 35.36                 | 4.384 | 0.0323 | 110->113(82.0%) 107->113(11.1%)                                 |
| 5  | 281.0 | 35.59                 | 4.413 | 0.0087 | 111->113(49.3%) 107->113(33.6%)                                 |
| 6  | 280.6 | 35.64                 | 4.419 | 0.0001 | 107->114(51.6%) 111->114(31.0%)                                 |
| 7  | 278.1 | 35.96                 | 4.459 | 0.0001 | 109->113(88.7%)                                                 |
| 8  | 275.4 | 36.31                 | 4.502 | 0.0001 | 110->114(78.2%)                                                 |
| 9  | 275.3 | 36.32                 | 4.503 | 0.0012 | 108->113(88.5%)                                                 |
| 10 | 270.4 | 36.98                 | 4.585 | 0.0004 | 106->113(95.9%)                                                 |
| 11 | 264.9 | 37.75                 | 4.680 | 0.1936 | 112->115(76.8%) 107->113(11.1%)                                 |
| 12 | 261.9 | 38.18                 | 4.734 | 0.0014 | 111->114(61.9%) 107->114(31.2%)                                 |
| 13 | 257.6 | 38.82                 | 4.813 | 0.0001 | 108->114(68.0%) 109->114(27.2%)                                 |
| 14 | 256.8 | 38.95                 | 4.829 | 0.0123 | 105->114(90.0%)                                                 |
| 15 | 255.7 | 39.11                 | 4.849 | 0.0001 | 109->114(61.0%) 108->114(28.6%)                                 |
| 16 | 247.2 | 40.46                 | 5.016 | 0.0445 | 111->115(60.6%) 107->115(18.1%) 110->115(11.3%)                 |
| 17 | 246.0 | 40.65                 | 5.040 | 0.7166 | 106->114(76.6%)                                                 |
| 18 | 244.7 | 40.86                 | 5.066 | 0.0007 | 105->113(91.7%)                                                 |
| 19 | 243.0 | 41.16                 | 5.103 | 0.0015 | 104->114(75.0%)                                                 |
| 20 | 241.0 | 41.49                 | 5.144 | 0.0130 | 110->115(74.0%) 107->115(17.6%)                                 |
| 21 | 239.9 | 41.69                 | 5.169 | 0.0123 | 109->115(62.3%) 111->115(11.6%)                                 |
| 22 | 238.8 | 41.88                 | 5.193 | 0.0282 | 107->115(37.4%) 111->115(19.5%) 109->115(18.7%)                 |
| 23 | 236.3 | 42.31                 | 5.246 | 0.0090 | 108->115(37.8%) 108->116(21.2%)                                 |
| 24 | 235.4 | 42.48                 | 5.267 | 0.0003 | 109->116(36.6%) 111->120(12.6%) 109->115(10.3%)                 |
| 25 | 235.1 | 42.54                 | 5.274 | 0.0021 | 108->115(43.3%) 108->116(21.3%)                                 |
| 26 | 234.6 | 42.62                 | 5.284 | 0.3588 | 104->113(79.6%)                                                 |
| 27 | 230.5 | 43.38                 | 5.379 | 0.0013 | 106->115(96.7%)                                                 |
| 28 | 223.7 | 44.71                 | 5.543 | 0.1702 | 112->117(22.7%) 112->116(22.0%) 102->113(20.4%)                 |
| 29 | 222.6 | 44.92                 | 5.569 | 0.3344 | 111->116(45.7%)                                                 |
| 30 | 221.0 | 45.24                 | 5.609 | 0.0007 | 102->114(81.0%)                                                 |
| 31 | 219.4 | 45.59                 | 5.652 | 0.1026 | 112->116(44.9%) 110->116(21.6%) 102->113(11.6%)                 |
| 32 | 217.9 | 45.90                 | 5.691 | 0.0316 | 111->116(18.2%) 100->114(14.4%) 96->114(14.2%) 103->114(10.1%)  |
| 33 | 217.5 | 45.98                 | 5.701 | 0.0023 | 103->113(75.5%)                                                 |
| 34 | 216.9 | 46.09                 | 5.715 | 0.0221 | 101->113(46.3%) 110->116(12.2%)                                 |
| 35 | 215.8 | 46.34                 | 5.746 | 0.0174 | 110->116(36.1%) 112->116(15.0%) 101->113(11.8%)                 |
| 36 | 214.9 | 46.53                 | 5.769 | 0.0480 | 102->113(57.6%) 112->117(18.4%)                                 |
| 37 | 211.8 | 47.22                 | 5.854 | 0.0021 | 106->116(81.2%)                                                 |
| 38 | 211.1 | 47.37                 | 5.873 | 0.0004 | 105->115(89.8%)                                                 |
| 39 | 209.8 | 47.68                 | 5.911 | 0.0052 | 100->113(56.0%) 96->113(21.3%) 103->113(15.1%)                  |
| 40 | 207.5 | 48.19                 | 5.975 | 0.0442 | 112->118(27.8%) 110->117(19.3%) 111->117(15.0%) 112->117(10.7%) |

## Naphthyl 4

Summary of calculated electronic transitions:

| #  | nm    | 1000 cm <sup>-1</sup> | eV    | f      | Assignment (excitations with contrib. greater than 10.0%)                       |
|----|-------|-----------------------|-------|--------|---------------------------------------------------------------------------------|
| 1  | 356.8 | 28.03                 | 3.475 | 0.0018 | 137->139(87.6%) 138->139(11.9%)                                                 |
| 2  | 351.7 | 28.43                 | 3.525 | 0.0052 | 138->139(87.8%) 137->139(11.8%)                                                 |
| 3  | 328.4 | 30.45                 | 3.775 | 0.0486 | 138->140(69.3%) 137->140(27.8%)                                                 |
| 4  | 324.7 | 30.80                 | 3.819 | 0.0072 | 137->140(67.4%) 138->140(29.0%)                                                 |
| 5  | 318.4 | 31.41                 | 3.894 | 0.2317 | 136->139(93.3%)                                                                 |
| 6  | 305.2 | 32.77                 | 4.063 | 0.0002 | 136->140(87.1%)                                                                 |
| 7  | 296.4 | 33.74                 | 4.183 | 0.0094 | 137->141(85.6%) 138->141(11.7%)                                                 |
| 8  | 291.1 | 34.35                 | 4.259 | 0.1774 | 138->142(49.3%) 138->141(25.5%)                                                 |
| 9  | 290.0 | 34.48                 | 4.275 | 0.2054 | 137->142(38.1%) 138->141(37.4%)                                                 |
| 10 | 289.0 | 34.60                 | 4.290 | 0.0191 | 134->139(79.7%)                                                                 |
| 11 | 288.7 | 34.64                 | 4.295 | 0.1378 | 137->142(19.9%) 138->141(19.3%) 138->142(18.1%) 134->139(13.4%) 133->139(11.5%) |
| 12 | 286.6 | 34.89                 | 4.326 | 0.0093 | 133->139(55.8%) 137->142(17.6%)                                                 |
| 13 | 285.5 | 35.02                 | 4.342 | 0.0025 | 135->139(88.1%)                                                                 |
| 14 | 279.9 | 35.73                 | 4.430 | 0.0003 | 133->140(82.3%)                                                                 |
| 15 | 275.8 | 36.25                 | 4.495 | 0.0038 | 138->146(25.9%) 135->142(17.0%) 135->140(16.2%) 135->143(14.7%) 138->143(10.1%) |
| 16 | 275.1 | 36.35                 | 4.507 | 0.0067 | 138->143(40.3%) 137->145(11.7%) 134->142(11.5%) 138->142(10.5%)                 |
| 17 | 274.4 | 36.44                 | 4.518 | 0.0068 | 138->143(24.5%) 137->145(23.3%) 134->142(22.0%) 134->143(10.9%)                 |
| 18 | 273.7 | 36.54                 | 4.530 | 0.0004 | 132->139(89.2%)                                                                 |
| 19 | 272.0 | 36.76                 | 4.558 | 0.0126 | 137->143(78.7%) 137->142(10.0%)                                                 |
| 20 | 265.3 | 37.69                 | 4.673 | 0.0989 | 136->141(47.2%) 134->140(34.2%)                                                 |
| 21 | 264.9 | 37.75                 | 4.680 | 0.0120 | 135->140(63.0%) 134->140(20.7%)                                                 |
| 22 | 264.8 | 37.77                 | 4.683 | 0.0875 | 134->140(41.1%) 136->141(33.7%) 135->140(10.9%)                                 |
| 23 | 259.3 | 38.57                 | 4.782 | 0.0028 | 129->140(49.9%) 131->140(26.4%) 132->140(11.5%)                                 |
| 24 | 252.5 | 39.60                 | 4.910 | 0.0687 | 128->140(43.0%) 129->140(13.0%) 132->140(12.7%)                                 |
| 25 | 248.8 | 40.19                 | 4.983 | 0.5050 | 132->140(56.1%) 131->140(12.9%)                                                 |
| 26 | 247.9 | 40.34                 | 5.002 | 0.0033 | 134->141(93.0%)                                                                 |
| 27 | 246.5 | 40.56                 | 5.029 | 0.0164 | 131->139(65.3%) 129->139(23.8%)                                                 |
| 28 | 243.4 | 41.08                 | 5.093 | 0.0012 | 135->141(88.1%)                                                                 |
| 29 | 242.7 | 41.20                 | 5.108 | 0.0366 | 133->141(74.9%)                                                                 |
| 30 | 237.7 | 42.08                 | 5.217 | 0.1106 | 138->144(32.6%) 129->139(21.8%) 128->139(18.0%)                                 |
| 31 | 237.2 | 42.17                 | 5.228 | 0.0070 | 136->142(80.9%) 138->144(11.9%)                                                 |
| 32 | 236.8 | 42.23                 | 5.236 | 0.0585 | 138->144(47.0%) 129->139(16.0%) 128->139(12.3%)                                 |
| 33 | 235.4 | 42.49                 | 5.268 | 0.0600 | 130->139(38.8%) 137->144(13.5%) 129->139(12.7%) 128->139(12.1%)                 |
| 34 | 234.9 | 42.58                 | 5.279 | 0.0122 | 135->142(45.9%) 135->143(24.9%)                                                 |
| 35 | 234.4 | 42.66                 | 5.289 | 0.0065 | 137->144(63.2%)                                                                 |
| 36 | 233.8 | 42.78                 | 5.304 | 0.0001 | 132->141(85.9%)                                                                 |
| 37 | 233.4 | 42.85                 | 5.313 | 0.0180 | 128->140(18.0%) 126->140(15.9%) 131->140(10.9%) 130->140(10.3%)                 |
| 38 | 232.7 | 42.98                 | 5.329 | 0.0313 | 134->143(41.8%) 134->142(36.9%)                                                 |
| 39 | 231.3 | 43.23                 | 5.360 | 0.0004 | 132->142(58.5%)                                                                 |
| 40 | 230.3 | 43.42                 | 5.383 | 0.0096 | 138->145(65.6%)                                                                 |

### Styrenyl 5

Summary of calculated electronic transitions:

| #  | nm    | 1000 cm <sup>-1</sup> | eV    | f      | Assignment (excitations with contrib. greater than 10.0%)       |
|----|-------|-----------------------|-------|--------|-----------------------------------------------------------------|
| 1  | 327.2 | 30.56                 | 3.789 | 0.0264 | 126->127(62.8%) 125->127(24.2%) 124->127(10.9%)                 |
| 2  | 321.7 | 31.08                 | 3.854 | 0.0116 | 125->127(58.7%) 126->127(34.4%)                                 |
| 3  | 315.6 | 31.69                 | 3.929 | 0.2270 | 124->127(77.0%) 125->127(16.5%)                                 |
| 4  | 308.3 | 32.44                 | 4.022 | 0.0002 | 124->128(50.3%) 125->128(26.4%) 126->128(11.9%)                 |
| 5  | 300.4 | 33.29                 | 4.127 | 0.0001 | 125->128(51.6%) 126->128(38.1%)                                 |
| 6  | 294.3 | 33.98                 | 4.213 | 0.0002 | 126->128(42.8%) 124->128(39.6%) 125->128(16.3%)                 |
| 7  | 287.5 | 34.79                 | 4.313 | 0.1354 | 121->127(78.7%)                                                 |
| 8  | 277.6 | 36.02                 | 4.466 | 0.0009 | 121->128(77.9%)                                                 |
| 9  | 275.2 | 36.33                 | 4.505 | 0.2270 | 126->129(53.3%) 126->130(20.3%) 123->127(10.1%)                 |
| 10 | 274.2 | 36.46                 | 4.521 | 0.1778 | 123->127(78.2%) 126->130(10.7%)                                 |
| 11 | 273.3 | 36.59                 | 4.537 | 0.5604 | 126->130(38.7%) 126->129(17.6%) 125->129(15.9%)                 |
| 12 | 271.7 | 36.80                 | 4.563 | 0.0324 | 122->127(91.1%)                                                 |
| 13 | 270.1 | 37.03                 | 4.591 | 0.6511 | 125->130(41.6%) 125->129(18.7%) 126->130(11.2%) 126->129(10.8%) |
| 14 | 269.2 | 37.15                 | 4.606 | 0.0052 | 120->127(95.5%)                                                 |
| 15 | 268.6 | 37.23                 | 4.616 | 0.2293 | 125->129(49.9%) 125->130(27.4%) 126->129(13.0%)                 |
| 16 | 264.1 | 37.87                 | 4.695 | 0.1750 | 124->129(76.5%)                                                 |
| 17 | 259.9 | 38.48                 | 4.771 | 0.0735 | 126->131(24.5%) 123->130(20.3%) 123->131(12.9%)                 |
| 18 | 258.0 | 38.75                 | 4.805 | 0.0048 | 122->130(44.3%) 122->131(17.7%) 125->134(11.8%)                 |
| 19 | 256.6 | 38.96                 | 4.831 | 0.0938 | 119->128(45.3%) 126->131(25.6%)                                 |
| 20 | 256.1 | 39.05                 | 4.842 | 0.0748 | 126->131(29.2%) 119->128(28.4%) 123->130(13.6%)                 |
| 21 | 255.4 | 39.16                 | 4.855 | 0.0013 | 122->128(72.7%) 123->128(10.2%)                                 |
| 22 | 255.1 | 39.21                 | 4.861 | 0.1049 | 125->131(69.6%) 119->128(10.3%)                                 |
| 23 | 252.8 | 39.56                 | 4.905 | 0.0002 | 123->128(76.3%) 122->128(18.3%)                                 |
| 24 | 247.2 | 40.45                 | 5.015 | 0.0008 | 118->128(71.4%)                                                 |
| 25 | 244.1 | 40.97                 | 5.080 | 0.1035 | 120->128(33.6%) 121->129(25.8%) 119->127(19.8%)                 |
| 26 | 243.8 | 41.01                 | 5.085 | 0.0283 | 119->127(75.7%)                                                 |
| 27 | 242.3 | 41.26                 | 5.116 | 0.1426 | 121->129(43.2%) 120->128(23.5%)                                 |
| 28 | 240.1 | 41.65                 | 5.164 | 0.0009 | 124->130(93.9%)                                                 |
| 29 | 236.7 | 42.26                 | 5.239 | 0.0026 | 123->129(86.6%)                                                 |
| 30 | 234.1 | 42.72                 | 5.297 | 0.2173 | 118->127(72.9%) 120->128(13.7%)                                 |
| 31 | 233.1 | 42.89                 | 5.318 | 0.0011 | 122->129(94.6%)                                                 |
| 32 | 230.8 | 43.33                 | 5.372 | 0.0161 | 124->131(93.8%)                                                 |
| 33 | 230.1 | 43.46                 | 5.388 | 0.0002 | 120->129(95.4%)                                                 |
| 34 | 228.5 | 43.76                 | 5.426 | 0.0022 | 117->128(62.2%) 113->128(18.3%)                                 |
| 35 | 227.7 | 43.92                 | 5.445 | 0.0355 | 117->127(60.3%)                                                 |
| 36 | 227.0 | 44.05                 | 5.462 | 0.0113 | 123->130(44.9%) 123->131(37.0%)                                 |
| 37 | 225.9 | 44.26                 | 5.488 | 0.0013 | 120->130(72.9%)                                                 |
| 38 | 225.3 | 44.38                 | 5.502 | 0.0052 | 122->131(49.7%) 122->130(39.7%)                                 |
| 39 | 222.6 | 44.92                 | 5.570 | 0.0048 | 125->132(58.9%) 126->132(38.4%)                                 |
| 40 | 222.2 | 45.00                 | 5.579 | 0.0010 | 121->130(81.2%)                                                 |

Acetylphenyl **6**

Summary of calculated electronic transitions:

| #  | nm    | 1000 cm <sup>-1</sup> | eV    | f      | Assignment (excitations with contrib. greater than 10.0%)                       |
|----|-------|-----------------------|-------|--------|---------------------------------------------------------------------------------|
| 1  | 319.5 | 31.29                 | 3.880 | 0.2041 | 122->125(73.1%) 124->125(13.0%)                                                 |
| 2  | 308.1 | 32.46                 | 4.024 | 0.0002 | 122->126(68.3%) 124->126(12.4%)                                                 |
| 3  | 302.4 | 33.07                 | 4.100 | 0.0450 | 124->125(80.3%) 122->125(16.3%)                                                 |
| 4  | 299.0 | 33.45                 | 4.147 | 0.0368 | 123->125(90.7%)                                                                 |
| 5  | 286.3 | 34.93                 | 4.331 | 0.0937 | 119->125(72.5%)                                                                 |
| 6  | 285.9 | 34.97                 | 4.336 | 0.0011 | 123->126(60.1%) 119->126(13.4%) 124->126(13.2%)                                 |
| 7  | 284.2 | 35.18                 | 4.362 | 0.0003 | 122->126(30.9%) 124->126(26.3%) 123->126(20.1%) 119->126(17.0%)                 |
| 8  | 274.2 | 36.46                 | 4.521 | 0.0001 | 124->126(45.7%) 119->126(45.2%)                                                 |
| 9  | 266.7 | 37.49                 | 4.648 | 0.0112 | 118->125(76.7%) 121->125(11.8%)                                                 |
| 10 | 266.2 | 37.56                 | 4.657 | 0.0542 | 121->125(38.9%) 122->127(26.2%) 118->125(19.0%)                                 |
| 11 | 264.8 | 37.77                 | 4.683 | 0.0480 | 121->125(34.4%) 122->127(22.6%) 120->125(20.1%) 119->125(10.5%)                 |
| 12 | 263.0 | 38.02                 | 4.714 | 0.0072 | 120->125(76.5%)                                                                 |
| 13 | 260.0 | 38.46                 | 4.768 | 0.9917 | 124->128(56.2%) 124->127(12.1%)                                                 |
| 14 | 258.2 | 38.73                 | 4.802 | 0.8403 | 123->128(50.1%)                                                                 |
| 15 | 256.5 | 38.98                 | 4.833 | 0.1646 | 124->127(58.7%) 124->128(18.7%) 122->127(11.2%)                                 |
| 16 | 255.2 | 39.18                 | 4.858 | 0.0586 | 115->126(53.5%) 117->126(24.0%)                                                 |
| 17 | 252.7 | 39.58                 | 4.907 | 0.0290 | 123->127(75.1%)                                                                 |
| 18 | 251.3 | 39.79                 | 4.933 | 0.0604 | 121->128(36.0%) 121->129(17.0%) 124->132(16.3%)                                 |
| 19 | 251.2 | 39.81                 | 4.936 | 0.0123 | 120->128(39.6%) 120->129(11.3%) 123->131(11.1%)                                 |
| 20 | 250.7 | 39.88                 | 4.945 | 0.0023 | 120->126(32.5%) 114->126(27.9%) 121->126(17.1%)                                 |
| 21 | 247.0 | 40.49                 | 5.020 | 0.0001 | 120->126(53.8%) 121->126(39.1%)                                                 |
| 22 | 244.5 | 40.90                 | 5.071 | 0.2825 | 124->129(35.1%) 118->126(25.1%) 124->128(12.1%) 123->128(10.3%)                 |
| 23 | 244.0 | 40.99                 | 5.082 | 0.0016 | 114->126(47.6%) 121->126(32.1%)                                                 |
| 24 | 242.2 | 41.29                 | 5.119 | 0.0310 | 119->127(48.8%) 124->129(17.5%)                                                 |
| 25 | 241.7 | 41.38                 | 5.130 | 0.0011 | 115->125(55.6%) 117->125(38.8%)                                                 |
| 26 | 241.3 | 41.45                 | 5.139 | 0.0296 | 122->128(49.4%) 123->129(28.2%)                                                 |
| 27 | 241.1 | 41.48                 | 5.143 | 0.0540 | 123->129(41.1%) 122->128(36.2%) 119->127(10.9%)                                 |
| 28 | 240.0 | 41.67                 | 5.167 | 0.0901 | 124->129(28.1%) 118->126(23.0%) 114->125(14.7%)                                 |
| 29 | 232.0 | 43.11                 | 5.345 | 0.1585 | 114->125(70.1%) 118->126(14.2%)                                                 |
| 30 | 230.7 | 43.34                 | 5.374 | 0.0000 | 117->128(25.3%) 116->128(23.5%) 117->129(17.6%) 116->129(12.1%)                 |
| 31 | 230.2 | 43.44                 | 5.386 | 0.0014 | 116->129(18.7%) 117->128(15.6%) 116->128(13.5%) 122->129(11.3%) 118->128(10.8%) |
| 32 | 230.1 | 43.46                 | 5.388 | 0.0089 | 122->129(64.5%) 121->127(15.3%)                                                 |
| 33 | 229.9 | 43.51                 | 5.394 | 0.0033 | 121->127(63.5%) 122->129(18.7%)                                                 |
| 34 | 228.0 | 43.85                 | 5.437 | 0.0004 | 118->127(81.7%)                                                                 |
| 35 | 226.6 | 44.13                 | 5.472 | 0.0011 | 120->127(42.3%) 113->126(20.3%) 118->128(15.8%)                                 |
| 36 | 226.5 | 44.14                 | 5.473 | 0.0011 | 120->127(46.7%) 113->126(18.6%) 118->128(12.4%)                                 |
| 37 | 225.1 | 44.42                 | 5.507 | 0.0006 | 118->128(39.3%) 113->126(33.2%)                                                 |
| 38 | 224.4 | 44.56                 | 5.525 | 0.0453 | 113->125(48.0%) 122->130(16.1%)                                                 |
| 39 | 223.5 | 44.75                 | 5.548 | 0.0130 | 119->128(51.5%) 121->128(16.2%)                                                 |
| 40 | 223.3 | 44.78                 | 5.552 | 0.0008 | 116->125(72.4%) 117->125(11.0%)                                                 |

## Carbonyl 7

Summary of calculated electronic transitions:

| #  | nm    | 1000 cm <sup>-1</sup> | eV    | f      | Assignment (excitations with contrib. greater than 10.0%)       |
|----|-------|-----------------------|-------|--------|-----------------------------------------------------------------|
| 1  | 322.2 | 31.04                 | 3.848 | 0.0001 | 129->136(53.7%) 129->138(36.1%)                                 |
| 2  | 321.5 | 31.11                 | 3.857 | 0.0001 | 130->138(49.7%) 130->136(41.1%)                                 |
| 3  | 319.0 | 31.35                 | 3.887 | 0.2253 | 134->135(94.0%)                                                 |
| 4  | 308.3 | 32.43                 | 4.021 | 0.0013 | 134->137(89.9%)                                                 |
| 5  | 287.9 | 34.74                 | 4.307 | 0.1169 | 127->135(49.1%) 133->135(26.0%) 131->135(10.2%)                 |
| 6  | 281.5 | 35.53                 | 4.405 | 0.0005 | 127->137(49.2%) 133->137(24.9%) 131->137(11.6%)                 |
| 7  | 271.4 | 36.84                 | 4.568 | 0.0607 | 132->135(62.9%) 133->135(10.8%)                                 |
| 8  | 269.9 | 37.04                 | 4.593 | 0.0064 | 133->135(51.1%) 127->135(13.1%) 134->139(10.5%)                 |
| 9  | 269.1 | 37.17                 | 4.608 | 0.0191 | 131->136(39.5%) 131->138(28.8%) 131->135(10.1%)                 |
| 10 | 268.3 | 37.28                 | 4.622 | 0.0170 | 128->136(21.1%) 132->135(18.1%) 132->136(10.8%)                 |
| 11 | 267.7 | 37.36                 | 4.632 | 0.0013 | 132->137(58.1%) 124->137(10.7%)                                 |
| 12 | 266.3 | 37.54                 | 4.655 | 0.0259 | 131->135(64.0%) 134->139(12.5%)                                 |
| 13 | 265.7 | 37.63                 | 4.666 | 0.0021 | 126->135(92.1%)                                                 |
| 14 | 264.5 | 37.81                 | 4.688 | 0.1039 | 134->136(73.1%)                                                 |
| 15 | 262.6 | 38.08                 | 4.721 | 0.1585 | 134->139(52.3%) 127->135(17.0%) 134->136(14.2%)                 |
| 16 | 261.4 | 38.26                 | 4.744 | 0.0589 | 128->135(86.0%)                                                 |
| 17 | 258.1 | 38.74                 | 4.803 | 0.0001 | 130->135(94.2%)                                                 |
| 18 | 257.7 | 38.81                 | 4.812 | 0.6969 | 133->136(38.1%) 134->138(21.2%)                                 |
| 19 | 255.9 | 39.08                 | 4.845 | 0.6500 | 125->137(28.1%) 132->136(21.0%) 128->136(13.5%)                 |
| 20 | 255.7 | 39.10                 | 4.848 | 0.0000 | 129->135(97.2%)                                                 |
| 21 | 253.7 | 39.42                 | 4.887 | 0.1136 | 133->137(29.8%) 125->137(20.6%) 127->137(19.9%)                 |
| 22 | 253.5 | 39.45                 | 4.891 | 0.0937 | 134->138(54.7%) 133->136(15.3%) 133->137(10.6%)                 |
| 23 | 253.3 | 39.47                 | 4.894 | 0.1596 | 125->137(30.6%) 133->137(15.0%) 134->138(13.7%) 132->136(10.2%) |
| 24 | 248.7 | 40.21                 | 4.986 | 0.0001 | 131->137(62.4%) 128->137(20.3%)                                 |
| 25 | 247.9 | 40.34                 | 5.001 | 0.0000 | 128->137(68.1%) 131->137(15.6%) 132->137(11.7%)                 |
| 26 | 244.4 | 40.92                 | 5.074 | 0.1206 | 133->138(54.5%) 133->136(27.1%)                                 |
| 27 | 243.0 | 41.15                 | 5.102 | 0.0039 | 127->139(38.1%) 133->139(27.4%) 131->139(10.1%)                 |
| 28 | 241.7 | 41.38                 | 5.130 | 0.0206 | 132->138(35.3%) 126->136(26.8%) 132->136(11.7%)                 |
| 29 | 241.5 | 41.40                 | 5.133 | 0.0048 | 126->136(42.5%) 132->138(13.0%) 131->136(12.6%)                 |
| 30 | 241.4 | 41.42                 | 5.136 | 0.0353 | 131->138(31.1%) 131->136(25.8%)                                 |
| 31 | 240.5 | 41.58                 | 5.155 | 0.0031 | 124->137(46.3%) 125->135(24.8%) 132->137(10.6%)                 |
| 32 | 240.3 | 41.61                 | 5.159 | 0.0887 | 126->137(29.3%) 132->138(18.5%) 133->138(12.8%) 124->135(10.8%) |
| 33 | 239.8 | 41.70                 | 5.170 | 0.0007 | 125->135(71.7%) 124->137(17.8%)                                 |
| 34 | 238.3 | 41.96                 | 5.202 | 0.0069 | 127->136(33.7%) 128->138(23.8%) 128->136(15.7%) 131->138(11.6%) |
| 35 | 237.6 | 42.09                 | 5.218 | 0.0034 | 129->137(69.9%) 127->136(11.4%)                                 |
| 36 | 237.5 | 42.10                 | 5.220 | 0.0036 | 130->137(41.5%) 128->138(29.3%) 127->136(14.9%)                 |
| 37 | 237.3 | 42.13                 | 5.224 | 0.0132 | 130->137(42.6%) 129->137(25.5%) 128->138(12.4%)                 |
| 38 | 234.6 | 42.63                 | 5.285 | 0.0000 | 130->136(51.5%) 130->138(42.9%)                                 |
| 39 | 233.5 | 42.83                 | 5.310 | 0.0000 | 129->138(57.5%) 129->136(39.3%)                                 |
| 40 | 232.7 | 42.96                 | 5.327 | 0.0080 | 133->139(45.2%) 132->139(25.6%) 127->139(19.6%)                 |



Propyl 8

Summary of calculated electronic transitions:

| #  | nm    | 1000 cm <sup>-1</sup> | eV    | f      | Assignment (excitations with contrib. greater than 10.0%) |
|----|-------|-----------------------|-------|--------|-----------------------------------------------------------|
| 1  | 318.9 | 31.36                 | 3.888 | 0.2392 | 96->97(94.0%)                                             |
| 2  | 300.1 | 33.33                 | 4.132 | 0.0003 | 96->98(86.1%) 94->98(10.2%)                               |
| 3  | 287.9 | 34.73                 | 4.306 | 0.0877 | 94->97(83.3%)                                             |
| 4  | 287.0 | 34.84                 | 4.320 | 0.0014 | 95->97(94.8%)                                             |
| 5  | 274.9 | 36.38                 | 4.511 | 0.0001 | 94->98(81.8%)                                             |
| 6  | 266.1 | 37.58                 | 4.659 | 0.1728 | 96->99(76.8%)                                             |
| 7  | 260.3 | 38.42                 | 4.763 | 0.0481 | 93->98(77.3%)                                             |
| 8  | 253.5 | 39.45                 | 4.891 | 0.5572 | 95->98(80.5%)                                             |
| 9  | 253.2 | 39.49                 | 4.896 | 0.0004 | 93->97(51.3%) 92->98(30.4%)                               |
| 10 | 252.2 | 39.66                 | 4.917 | 0.0013 | 93->97(40.1%) 92->98(37.6%) 90->98(12.2%)                 |
| 11 | 243.7 | 41.04                 | 5.088 | 0.0156 | 94->99(84.7%)                                             |
| 12 | 243.3 | 41.11                 | 5.097 | 0.0002 | 95->99(96.0%)                                             |
| 13 | 239.6 | 41.74                 | 5.175 | 0.2066 | 92->97(84.4%)                                             |
| 14 | 235.1 | 42.54                 | 5.274 | 0.0008 | 91->97(89.7%)                                             |
| 15 | 232.5 | 43.01                 | 5.333 | 0.0032 | 90->98(65.3%) 92->98(18.5%)                               |
| 16 | 231.8 | 43.13                 | 5.348 | 0.0415 | 90->97(72.5%)                                             |
| 17 | 223.3 | 44.79                 | 5.553 | 0.1254 | 91->98(53.6%) 82->98(14.2%)                               |
| 18 | 219.9 | 45.47                 | 5.637 | 0.1317 | 96->100(58.4%)                                            |
| 19 | 217.9 | 45.89                 | 5.690 | 0.0001 | 93->99(92.3%)                                             |
| 20 | 217.7 | 45.94                 | 5.696 | 0.0067 | 88->97(40.7%) 92->99(21.2%) 89->97(11.9%)                 |
| 21 | 216.1 | 46.27                 | 5.737 | 0.0046 | 87->97(62.3%) 82->97(20.1%)                               |
| 22 | 210.8 | 47.45                 | 5.883 | 0.2644 | 91->98(25.1%) 82->98(24.3%) 87->98(17.4%)                 |
| 23 | 207.4 | 48.21                 | 5.977 | 0.0642 | 92->99(63.0%) 89->97(21.6%)                               |
| 24 | 206.4 | 48.45                 | 6.007 | 0.0016 | 95->100(86.7%)                                            |
| 25 | 206.2 | 48.49                 | 6.012 | 0.0232 | 89->97(52.8%) 88->97(23.3%)                               |
| 26 | 205.3 | 48.71                 | 6.039 | 0.0007 | 91->99(84.5%)                                             |
| 27 | 202.6 | 49.37                 | 6.121 | 0.0003 | 88->98(61.1%) 89->98(18.9%)                               |
| 28 | 201.8 | 49.56                 | 6.145 | 0.0280 | 86->97(48.6%) 90->99(44.7%)                               |
| 29 | 201.6 | 49.61                 | 6.151 | 0.0484 | 86->97(44.8%) 90->99(38.7%)                               |
| 30 | 201.0 | 49.75                 | 6.168 | 0.0005 | 82->97(41.2%) 87->97(16.6%) 96->101(16.1%) 85->97(11.5%)  |
| 31 | 200.6 | 49.84                 | 6.180 | 0.0026 | 96->101(69.3%)                                            |
| 32 | 199.9 | 50.02                 | 6.202 | 0.2379 | 94->100(58.2%) 96->102(19.2%)                             |
| 33 | 197.7 | 50.59                 | 6.272 | 0.0114 | 83->97(45.2%) 88->99(23.0%)                               |
| 34 | 197.1 | 50.73                 | 6.290 | 0.0102 | 89->98(42.6%) 88->98(18.8%) 83->98(10.5%)                 |
| 35 | 196.7 | 50.84                 | 6.304 | 0.0174 | 87->98(40.4%) 82->98(11.4%) 89->98(11.2%)                 |
| 36 | 195.4 | 51.17                 | 6.344 | 0.0006 | 85->97(73.0%) 82->97(13.8%)                               |
| 37 | 194.8 | 51.33                 | 6.364 | 0.0002 | 84->97(47.0%) 81->97(29.7%) 80->97(12.8%)                 |
| 38 | 191.6 | 52.19                 | 6.471 | 0.0001 | 86->98(35.6%) 84->97(23.0%) 83->98(17.1%)                 |
| 39 | 191.2 | 52.30                 | 6.484 | 0.0004 | 86->98(29.5%) 84->97(23.6%) 80->97(12.5%) 81->97(12.0%)   |
| 40 | 190.4 | 52.53                 | 6.513 | 0.0011 | 87->99(45.5%) 81->97(17.6%) 82->99(12.8%)                 |
